# Supplementary material
Source: PubMed Central journal article supplement (PMC2844789)
Supplement: NIHMS109977-supplement-Supplementary_fig1.pdf [file NIHMS109977-supplement-Supplementary_fig1.pdf]

**TM-87-16 BT-16 STM-91-01 BT-12 NIH3T3**

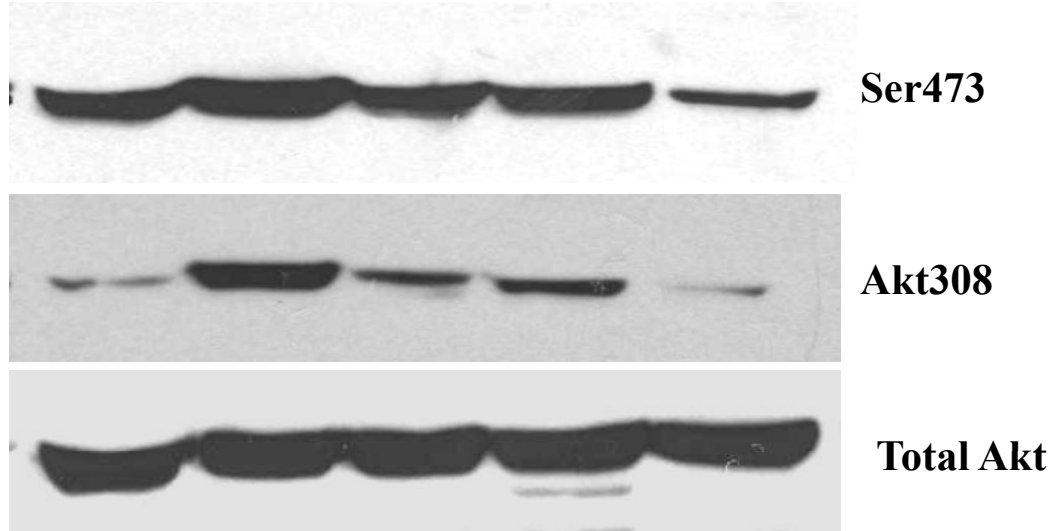

**Supplementary Figure S1**

**Supplementary Figure S1. Comparison of Akt phosphorylation in rhabdoid tumors and normal cells.**

Phosphorylation of Akt was assessed in four rhabdoid tumor cell lines (BT-12, BT-16, STM-91-01, and TM-87-16) and NIH3T3 cell line (**Supplementary Figure** ). The results show that all four tumor cell lines have high levels of endogenous pAkt than the normal control cell line NIH3T3. These results are consistent with previously observations where tumor cells susceptible to myxoma virus were found to have high endogenous levels of phosphorylated Akt (see reference 42).
